# Supplementary material for: 6-Furopyridine Hexamethylene Amiloride Is a Non-Selective P2X7 Receptor Antagonist
Source: MDPI journal article supplement (doi:10.3390/biom12091309), 2022-09-16
Supplement: s1 [file s1]

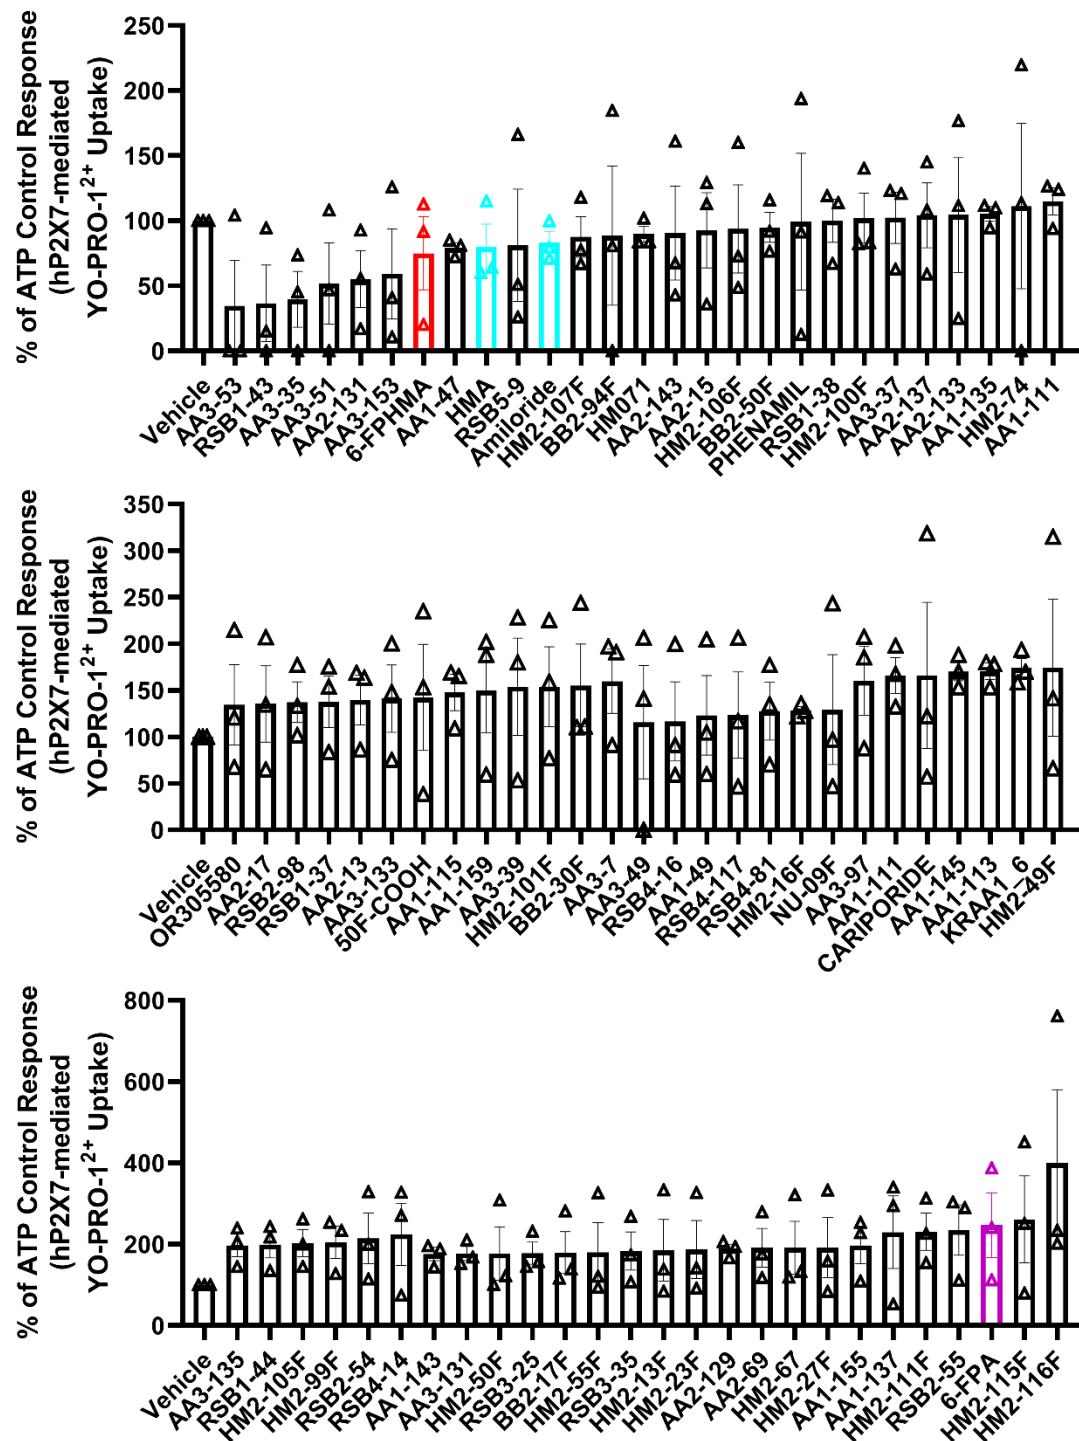

**Figure S1: Compound screening revealed 6-fuopyridine HMA (6-FPHMA), but not its analogue 6-fuopyridine-substituted amiloride (6-FPA), as a potential P2X7 antagonist.** RPMI8226 cells were plated and pre-incubated with 5  $\mu$ M of each compound or vehicle (DMSO) for 15 min, then with YO-PRO-1<sup>2+</sup> in the absence (basal) or presence of 250  $\mu$ M ATP. YO-PRO-1<sup>2+</sup> uptake was assessed by flow cytometry. Basal fluorescence was subtracted to determine the ATP-induced fluorescence for each compound and data were normalised to the vehicle ATP-induced response in each experiment. Data is presented as mean  $\pm$  SEM.  $n = 3$  independent experiments. Symbols represent individual experiments. Amiloride and HMA (cyan), 6-FPHMA (red) and 6-FPA (magenta) have been coloured for easier identification.

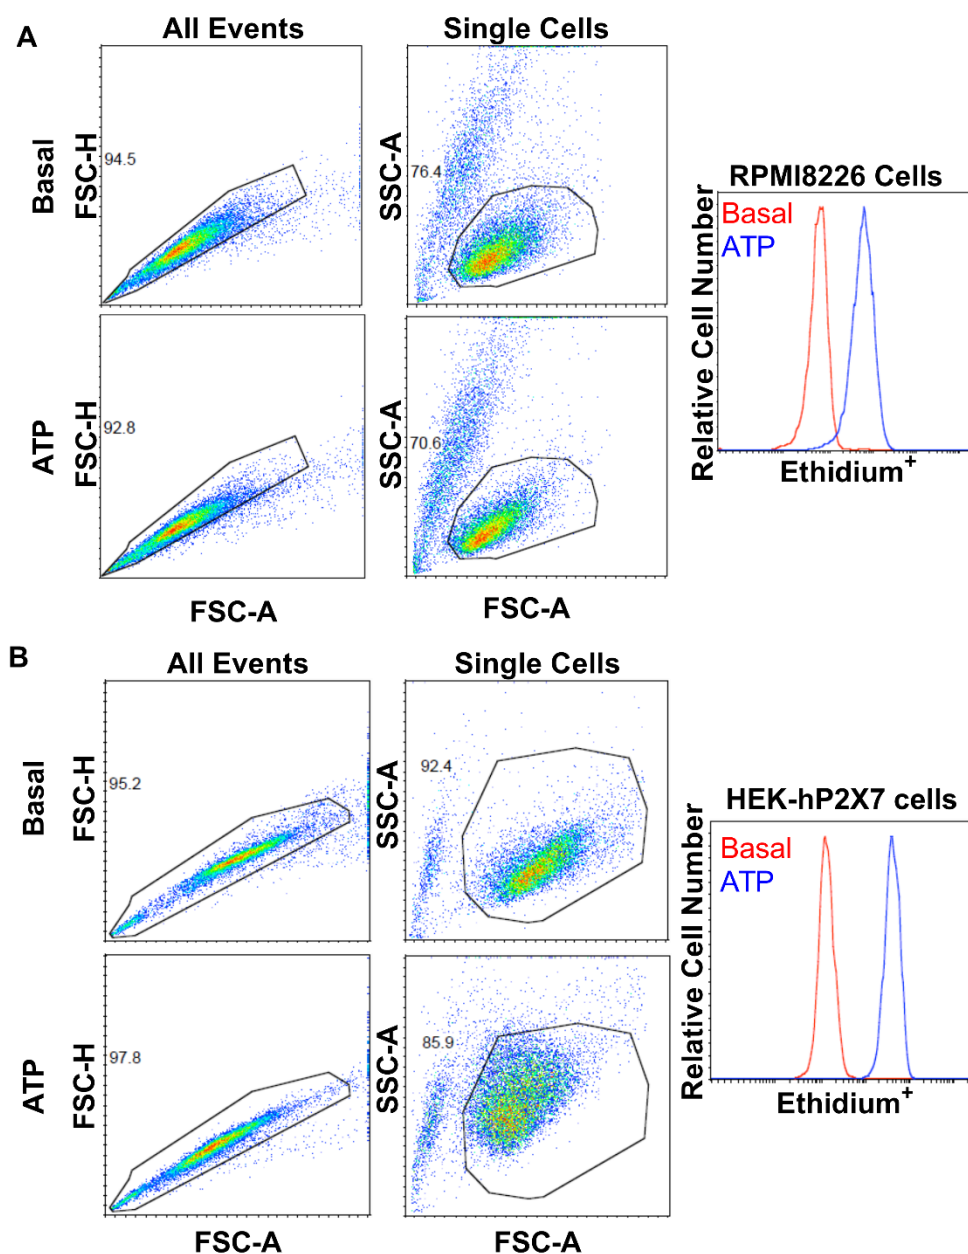

**Figure S2: Representative flow cytometric gating strategies to determine dye uptake into RPMI8226 and HEK-hP2X7 cells.** (A) RPMI8226 or (B) HEK-hP2X7 cells were pre-incubated (5 min) alone then incubated with ethidium<sup>+</sup> in the absence (basal) or presence of 2 mM ATP (5 min). (A, B) Ice-cold Mg<sup>2+</sup> stop solution was added and data acquired using flow cytometry. Forward scatter (FSC)-height (H) and FSC-area (A) were used to identify single cells. Side scatter (SSC)-A and FSC-A were used to identify live cells. Ethidium<sup>+</sup> MFI measured in live single cells. Images are from a single experiment for each cell type, with a consistent gating strategy used for all cell line-based dye uptake experiments.

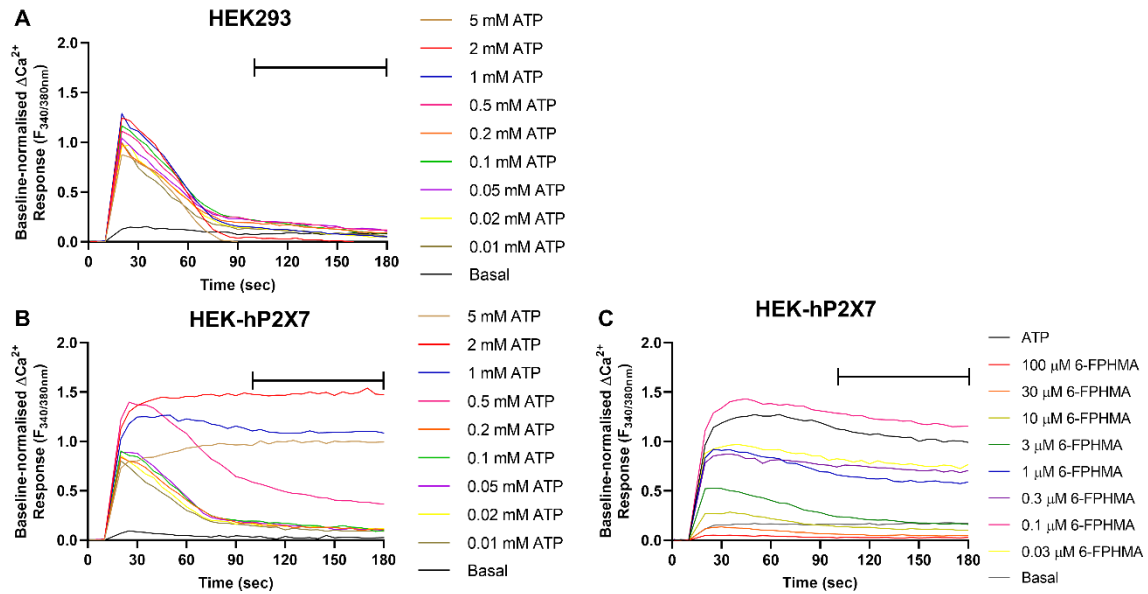

**Figure S3:  $\text{Ca}^{2+}$  response traces in non-transfected and P2X7-transfected HEK293 cells.** (A) HEK293 or (B, C) HEK-hP2X7 cells, pre-loaded with Fura-2AM, were pre-incubated (A, B) alone (20 min) or (C) in the presence of DMSO (vehicle) or 6-FPHMA at the concentrations indicated (30 min). Cells were incubated in the absence (basal) or presence of ATP at (A, B) the concentrations indicated or (C) 720  $\mu\text{M}$ . (A-C)  $\text{Ca}^{2+}$  traces ( $F_{340/380\text{nm}}$ ) were normalised to baseline (0-15 s) readings and the area under the curve from 100-180 s (bar marker) was used as a measure of hP2X7-mediated  $\text{Ca}^{2+}$  flux. (A-C) Data presented as mean. (A-C)  $n = 6$  independent experiments.

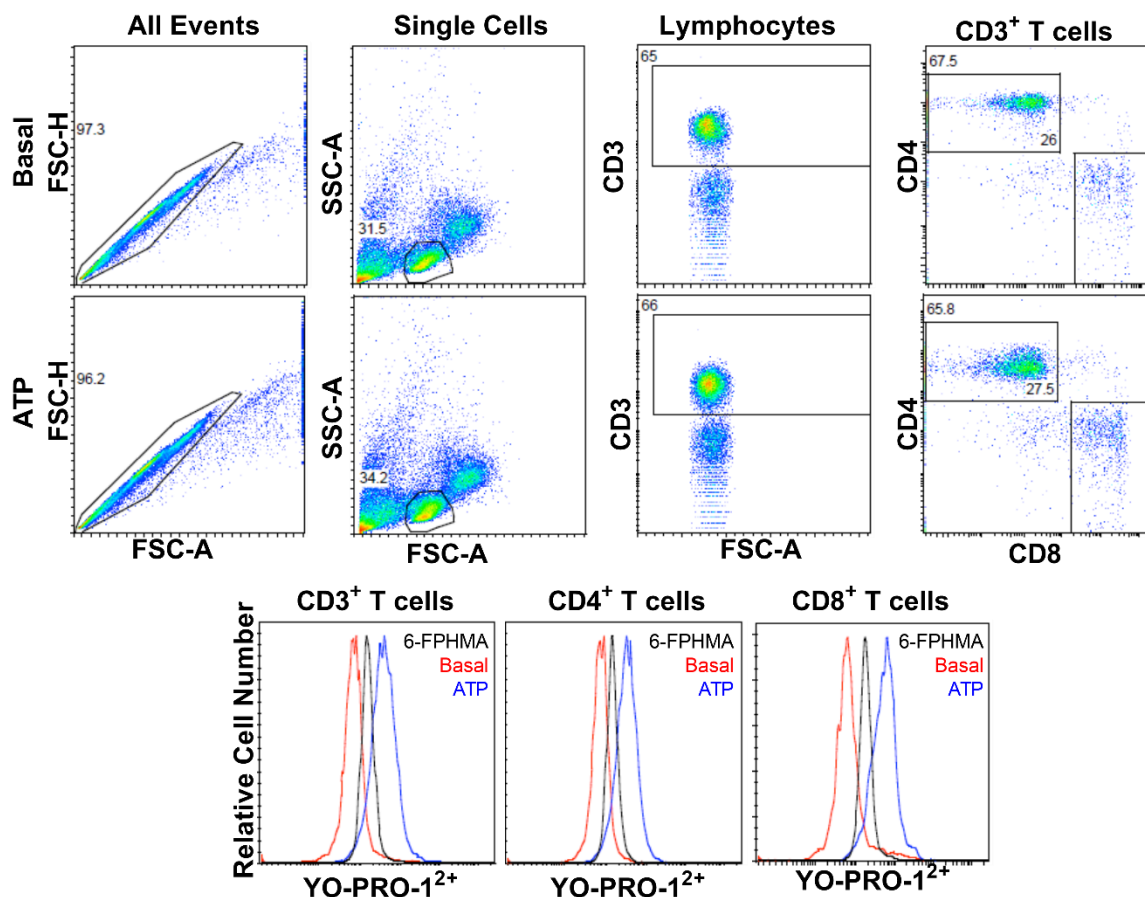

**Figure S4: Representative flow cytometric gating strategy to determine dye uptake into human T cells.** PBMCs were pre-incubated with 6-FPHMA (15 min) then incubated with YO-PRO-1<sup>2+</sup> in the absence (basal) or presence of 1 mM ATP (5 min). Ice-cold Mg<sup>2+</sup> stop solution was added and cells were stained with anti-CD3, anti-CD4 and anti-CD8 mAbs and data acquired using flow cytometry. FSC-H and FSC-A were used to identify single cells. SSC-A and FSC-A were used to identify lymphocytes. CD3<sup>+</sup> T cells were identified and divided into CD4<sup>+</sup> and CD8<sup>+</sup> subsets as shown. YO-PRO-1<sup>2+</sup> MFI was measured in CD3<sup>+</sup>, CD4<sup>+</sup> or CD8<sup>+</sup> T cells as shown. Images are from a single experiment, with a consistent gating strategy used for all PBMC-based dye uptake experiments.

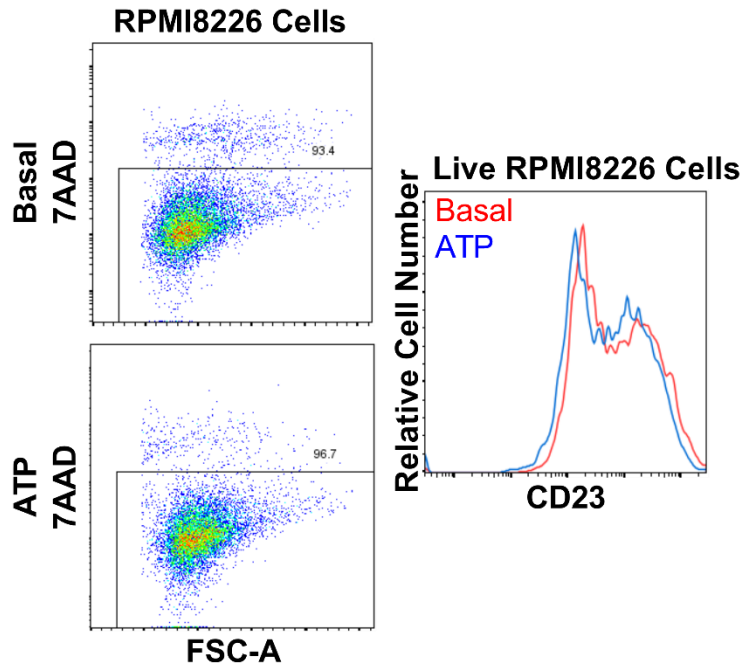

**Figure S5: Representative flow cytometric gating strategy to determine CD23 shedding from RPMI8226 cells.** RPMI8226 cells were pre-incubated (5 min) alone then incubated in the absence (basal) or presence of 2 mM ATP (1 min). Ice-cold  $Mg^{2+}$  stop solution was added and cells were stained with anti-CD23 mAb and the live/dead stain 7AAD. Data was acquired using flow cytometry. FSC-H, FSC-A and SSC-A were used to identify single RPMI8226 cells as shown in **Figure S2A**. FSC-A and 7AAD were used to identify live cells and CD23 MFI on live cells was determined as shown. Images are from a single experiment, with a consistent gating strategy used for all CD23 shedding experiments

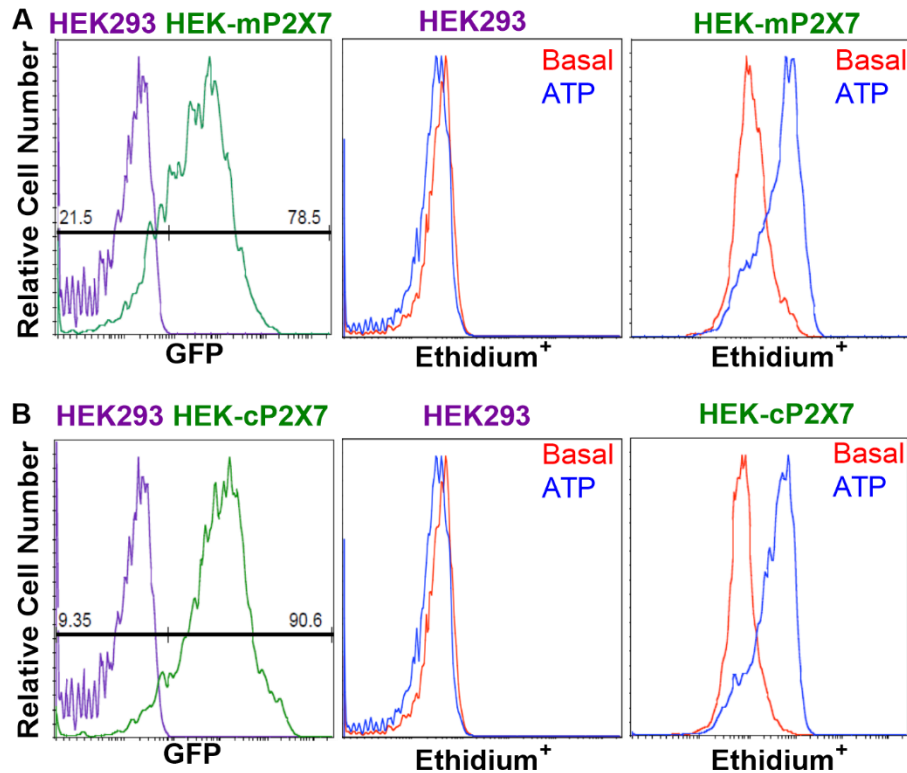

**Figure S6: Representative flow cytometric histograms of dye uptake into HEK-mP2X7 and HEK-cP2X7 cells.** (A, B) HEK293 or transfected (A) HEK-mP2X7 or (B) HEK-cP2X7 cells were pre-incubated (5 min) alone then incubated with ethidium<sup>+</sup> in the absence (basal) or presence of 2 mM ATP (5 min). (A, B) Ice-cold Mg<sup>2+</sup> stop solution was added and data acquired using flow cytometry. FSC-H, FSC-A and SSC-A were used to identify single HEK cells as shown in **Figure S2B**. GFP was used to identify transfected cells. Ethidium<sup>+</sup> MFI measured in GFP<sup>-</sup> (left markers) or GFP<sup>+</sup> (right markers) cells as shown. Images are from a single experiment for each cell type, with a consistent gating strategy used for all HEK-mP2X7 and HEK-cP2X7 dye uptake experiments.

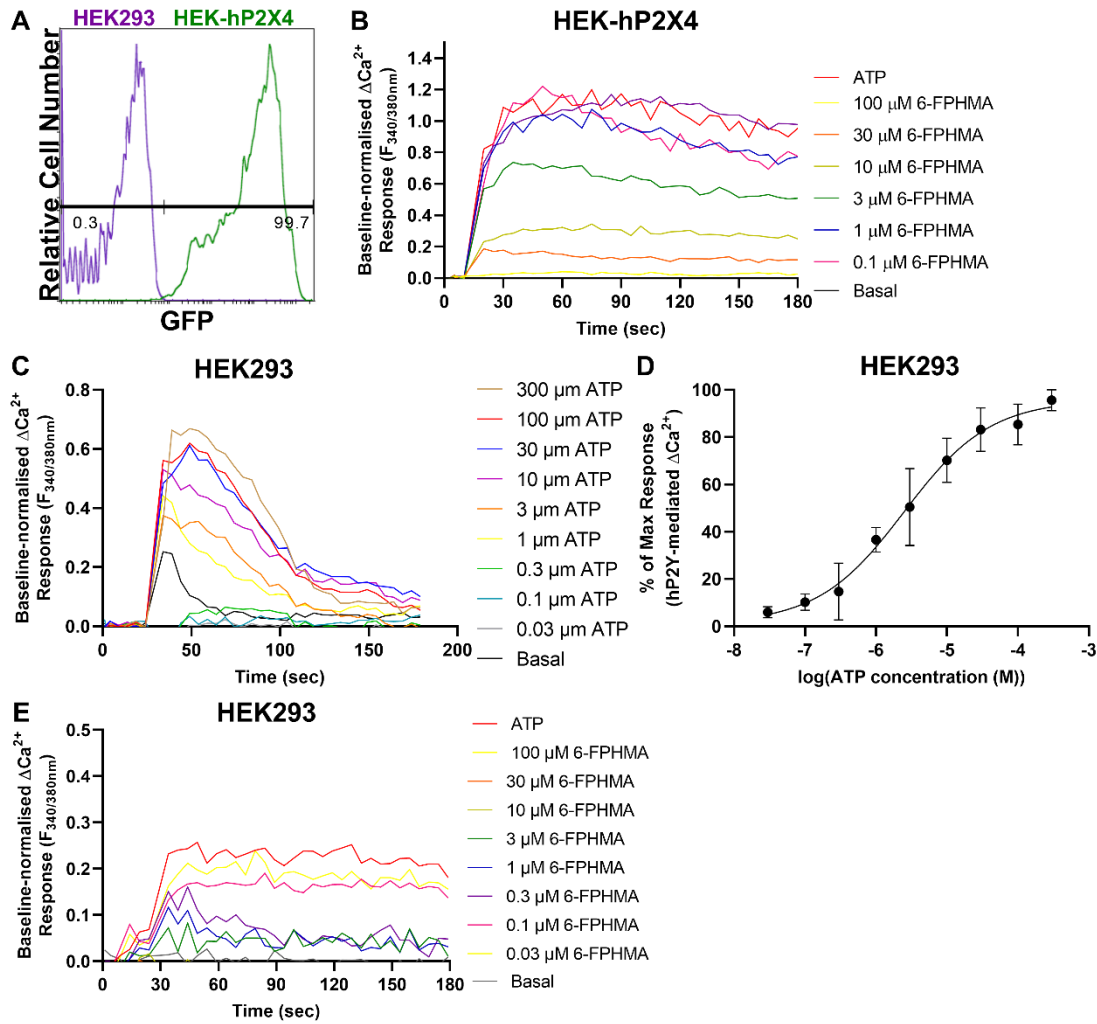

**Figure S7: Transfection efficiency and  $\text{Ca}^{2+}$  response traces in HEK-hp2X4 and HEK293 cells.** (A) HEK293 or HEK-hp2X4 cells were examined by flow cytometry to determine transfection efficiency. FSC-H, FSC-A and SSC-A were used to identify single HEK293 cells as shown in **Figure S2B** and GFP<sup>-</sup> (left marker) and GFP<sup>+</sup> (right marker) cells were identified. Image is from a single experiment, with a consistent gating strategy used to check transfection efficiency for all HEK-hp2X4 experiments. (B) HEK-hp2X4 or (C-E) HEK293 cells, pre-loaded with Fura-2AM, were pre-incubated (C, D) alone (20 min) or (B, E) in the presence of DMSO (vehicle) or 6-FPHMA at the concentrations indicated (30 min). Cells were incubated in the absence (basal) or presence of ATP at (B) 1  $\mu\text{M}$ , (C, D) the concentrations indicated or (E) 2.5  $\mu\text{M}$ . (B, C, E)  $\text{Ca}^{2+}$  traces ( $F_{340/380\text{nm}}$ ) were normalised to baseline (B: 0-15 s, C, E: 0-30 s) readings and the area under the curve from (B) 100-180 s or (C, E) 30-100 s was used as a measure of hp2X4- or hp2Y-mediated  $\text{Ca}^{2+}$  flux, respectively. (D) Data was normalised to the maximum ATP response in each experiment. Data presented as (B, C, E) mean or (D) mean  $\pm$  SEM. (B)  $n = 4 - 7$  and (C-E)  $n = 4$  independent experiments.
